# Supplementary material
Source: Springer Nature journal article supplement (https://www.springermedizin.de/resource/supplementary/12958_2014_1309_MOESM3_ESM.pdf/9567000)

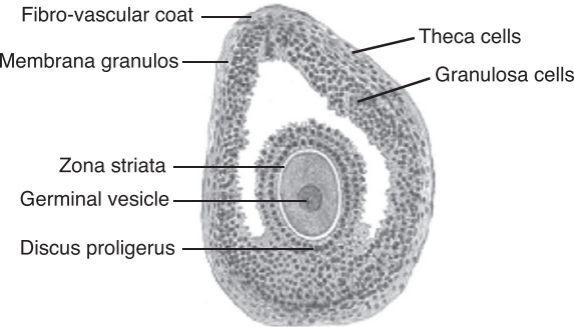

NB. During COS, there is a continuum of follicular development

Supplement: MOESM3 [file 9567000]
